# Supplementary material for: Preconditioning boosts regenerative programmes in the adult zebrafish heart
Source: PubMed Central journal article supplement (PMC4967829; doi:10.1098/rsob.160101), 2016-07-20
Supplement: rsob160101supp2.pdf [file rsob160101supp2.pdf]

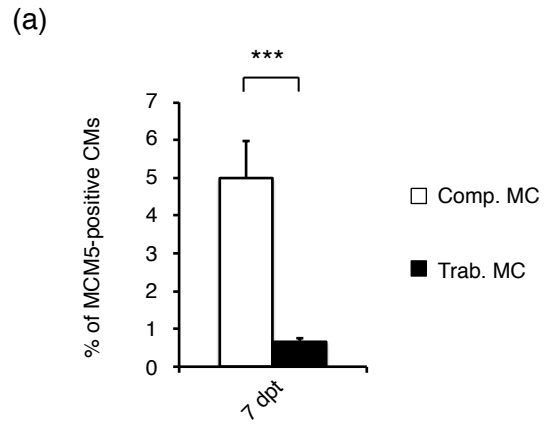

**Figure S2: Sublocalization of cycling CMs at 7 dpt**

(a) MCM5-positive CMs are mainly located in the compact myocardium at 7 dpt. ( $n \geq 3$ ;  $***P < 0.001$ ).
