# Supplementary material for: Preconditioning boosts regenerative programmes in the adult zebrafish heart
Source: PubMed Central journal article supplement (PMC4967829; doi:10.1098/rsob.160101), 2016-07-20
Supplement: rsob160101supp4.pdf [file rsob160101supp4.pdf]

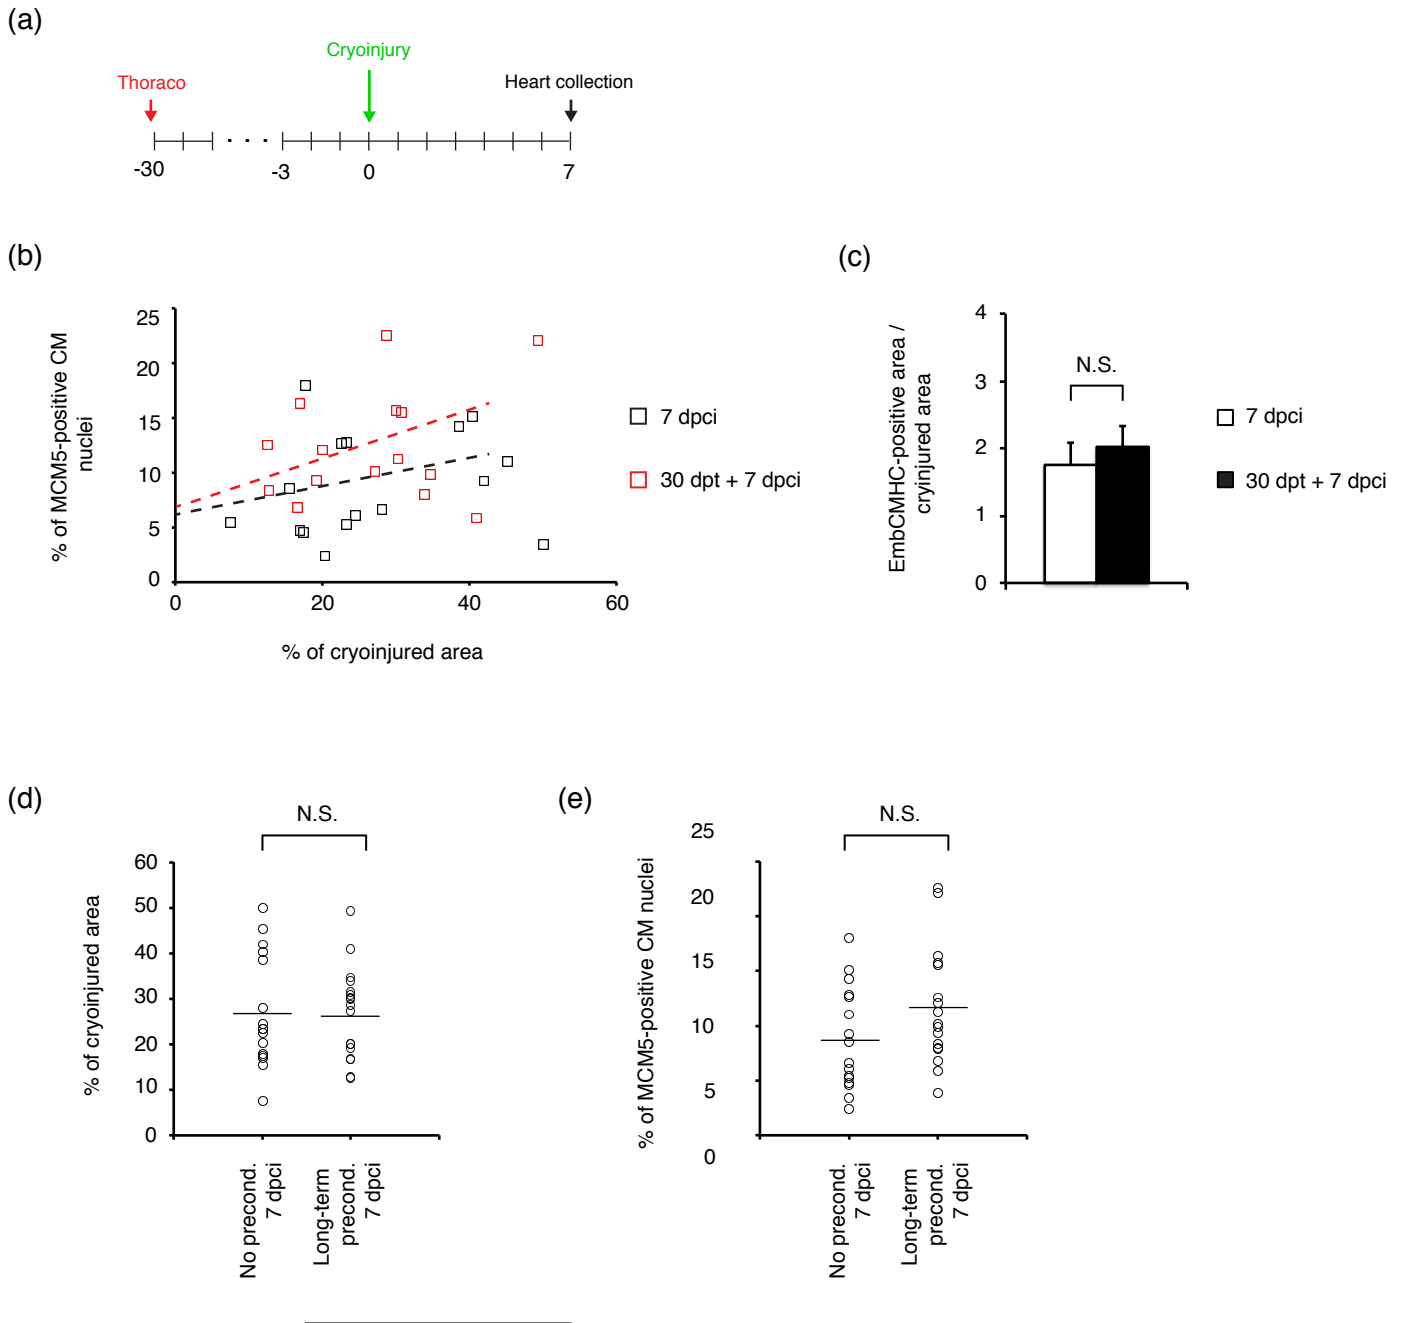

**Figure S3: The cardioprotective phenotype is lost at 30 dpt.**

(a) Experimental design. Fish were subjected to thoracotomy 30 days before the cryoinjury. (b) Scatter plot representing the % of MCM5-positive CM nuclei in function of the cryoinjured area while using thoracotomy (grey squares = 7 dpci; black squares = 30 dpt + 7dpci) as preconditioning stimulus. (c) Quantification of the EmbCMHC-positive area at 7 dpci. (d-e) Quantification of the percentage of the cryoinjured area and of MCM5-positive CM nuclei after long-term preconditioning using thoracotomy as a preconditioning stimulus. ( $n \geq 5$ )
